# Supplementary material
Source: publisher figshare collection journal article supplement (https://acs.figshare.com/ndownloader/files/11983382)
Supplement: Supplementary file 1 [file 11983382]

Compound_ID,SMILES,IC50 (nM)
10a,O=C1NN=C(CC2=CC=C(F)C(C(N3CC4(CCC4)C3)=O)=C2)C5=C1C=CC=C5,33.9
10b,O=C1NN=C(CC2=CC=C(F)C(C(N3CC4(COC4)C3)=O)=C2)C5=C1C=CC=C5,24.9
10c,O=C1NN=C(CC2=CC=C(F)C(C(N3CC4(CN(C4)C(OC(C)(C)C)=O)C3)=O)=C2)C5=C1C=CC=C5,551.6
10d,O=C1NN=C(CC2=CC=C(F)C(C(N3CC4(CNC4)C3)=O)=C2)C5=C1C=CC=C5,"2,395"
10e,O=C1NN=C(CC2=CC=C(F)C(C(N3CC4(CN(C(C5CC5)=O)C4)C3)=O)=C2)C6=C1C=CC=C6,12.6
11a,O=C1NN=C(CC2=CC=C(F)C(C(N3CCC34CCC4)=O)=C2)C5=C1C=CC=C5,36.5
11b,O=C1NN=C(CC2=CC=C(F)C(C(N3CCC34CN(C4)C(OC(C)(C)C)=O)=O)=C2)C5=C1C=CC=C5,877
11c,O=C1NN=C(CC2=CC=C(F)C(C(N3CCC34CNC4)=O)=C2)C5=C1C=CC=C5,526.1
11d,O=C1NN=C(CC2=CC=C(F)C(C(N3CCC34CN(C(C5CC5)=O)C4)=O)=C2)C6=C1C=CC=C6,129.7
12a,O=C1NN=C(CC2=CC=C(F)C(C(N3CC4(CCCCC4)C3)=O)=C2)C5=C1C=CC=C5,65.4
12b,O=C1NN=C(CC2=CC=C(F)C(C(N3CC4(CCN(CC4)C(OC(C)(C)C)=O)C3)=O)=C2)C5=C1C=CC=C5,"3,118"
12c,O=C1NN=C(CC2=CC=C(F)C(C(N3CC4(CCNCC4)C3)=O)=C2)C5=C1C=CC=C5,"1,419"
12d,O=C1NN=C(CC2=CC=C(F)C(C(N3CC4(CCN(C(C5CC5)=O)CC4)C3)=O)=C2)C6=C1C=CC=C6,100.1
13a,O=C1NN=C(CC2=CC=C(F)C(C(N3CCC34CCCCC4)=O)=C2)C5=C1C=CC=C5,284
13b,O=C1NN=C(CC2=CC=C(F)C(C(N3CCC34CCN(CC4)C(OC(C)(C)C)=O)=O)=C2)C5=C1C=CC=C5,"2,969"
13c,O=C1NN=C(CC2=CC=C(F)C(C(N3CCC34CCNCC4)=O)=C2)C5=C1C=CC=C5,110
13d,O=C1NN=C(CC2=CC=C(F)C(C(N3CCC34CCN(C(C5CC5)=O)CC4)=O)=C2)C6=C1C=CC=C6,431
14a,O=C1NN=C(CC2=CC=C(F)C(C(N3CCC4(CCC4)C3)=O)=C2)C5=C1C=CC=C5,32
14b,O=C1NN=C(CC2=CC=C(F)C(C(N3CCC4(CN(C4)C(OC(C)(C)C)=O)C3)=O)=C2)C5=C1C=CC=C5,"1,193"
14c,O=C1NN=C(CC2=CC=C(F)C(C(N3CCC4(CNC4)C3)=O)=C2)C5=C1C=CC=C5,"1,237"
14d,O=C1NN=C(CC2=CC=C(F)C(C(N3CCC4(CN(C(C5CC5)=O)C4)C3)=O)=C2)C6=C1C=CC=C6,"2,535"
15a,O=C(C1=CC(CC2=NNC(C3=C2C=CC=C3)=O)=CC=C1F)N4CC5(CC4)CCCCC5,51
15b,O=C(C1=CC(CC2=NNC(C3=C2C=CC=C3)=O)=CC=C1F)N4CC5(CC4)CCN(CC5)C(OC(C)(C)C)=O,"4,397"
15c,O=C(C1=CC(CC2=NNC(C3=C2C=CC=C3)=O)=CC=C1F)N4CC5(CC4)CCNCC5,"1,118"
15d,O=C(C1=CC(CC2=NNC(C3=C2C=CC=C3)=O)=CC=C1F)N4CC5(CC4)CCN(C(C6CC6)=O)CC5,"2,586"
16a,O=C1NN=C(CC2=CC=C(F)C(C(N3CCC4(CCCC4)C3)=O)=C2)C5=C1C=CC=C5,141
16b,O=C1NN=C(CC2=CC=C(F)C(C(N3CCC4(CCN(C4)C(OC(C)(C)C)=O)C3)=O)=C2)C5=C1C=CC=C5,"1,105"
16c,O=C1NN=C(CC2=CC=C(F)C(C(N3CCC4(CCNC4)C3)=O)=C2)C5=C1C=CC=C5,"3,881"
16d,O=C1NN=C(CC2=CC=C(F)C(C(N3CCC4(CCN(C(C5CC5)=O)C4)C3)=O)=C2)C6=C1C=CC=C6,225
17a,O=C1NN=C(CC2=CC=C(F)C(C(N3CCC4(CCCCC4)CC3)=O)=C2)C5=C1C=CC=C5,57
17b,O=C1NN=C(CC2=CC=C(F)C(C(N3CCC4(CCN(CC4)C(OC(C)(C)C)=O)CC3)=O)=C2)C5=C1C=CC=C5,453
17c,O=C1NN=C(CC2=CC=C(F)C(C(N3CCC4(CCNCC4)CC3)=O)=C2)C5=C1C=CC=C5,234
17d,O=C1NN=C(CC2=CC=C(F)C(C(N3CCC4(CCN(C(C5CC5)=O)CC4)CC3)=O)=C2)C6=C1C=CC=C6,44
